# The role of epidemic spreading in seizure dynamics and epilepsy surgery

Ana. P. Millán<sup>1,\*</sup>, Elisabeth C.W. van Straaten<sup>1,4,5</sup>, Cornelis J. Stam<sup>1,3,5</sup>, Ida A. Nissen<sup>1</sup>, Sander Idema<sup>2,4,6</sup>, Johannes C. Baayen<sup>2,4,6,7</sup>, Piet Van Mieghem<sup>8</sup>, and Arjan Hillebrand<sup>1,3,4</sup>

<sup>1</sup>Amsterdam UMC location Vrije Universiteit Amsterdam, Department of Clinical Neurophysiology and MEG Center, De Boelelaan 1117, Amsterdam, The Netherlands

<sup>2</sup>Amsterdam UMC, Vrije Universiteit Amsterdam, Department of Neurosurgery, De Boelelaan 1117, Amsterdam, The Netherlands

<sup>3</sup>Amsterdam Neuroscience, Brain Imaging, Amsterdam, The Netherlands

<sup>4</sup>Amsterdam Neuroscience, Systems & Network Neurosciences, Amsterdam, The Netherlands

<sup>5</sup>Amsterdam Neuroscience, Neurodegeneration, Amsterdam, The Netherlands

<sup>6</sup>Amsterdam Neuroscience, Cancer Biology and Immunology, Amsterdam, The Netherlands

<sup>7</sup>Amsterdam Neuroscience, Imaging and Biomarkers, Amsterdam, The Netherlands

<sup>8</sup>Faculty of Electrical Engineering, Mathematics and Computer Science, Delft University of Technology, Delft, The Netherlands

\*Corresponding author: [a.p.millanvidal@amsterdamumc.nl](mailto:a.p.millanvidal@amsterdamumc.nl)

## Abstract

Epilepsy surgery is the treatment of choice for drug-resistant epilepsy patients, but one in three patients continue to have seizures one year after surgery. In order to improve the chances of good outcomes, computational models of seizure dynamics are being integrated into surgical planning to simulate the effects of the planned surgeries. These modelling frameworks require several conceptual and methodological choices, as well as large amounts of patient-specific data, which hinders their clinical applicability. To address this problem, we considered the patient-specific brain network, derived from magnetoencephalography (MEG) recordings, and a simple epidemic spreading model as the dynamical basis for seizure propagation. This simple model was enough to reproduce the seizure propagation patterns derived from stereo-tactical electroencephalography recordings (SEEG) of all considered patients ( $N = 15$ ), when the patients' resected areas (RA) were used as the origin of epidemic spreading. The model yielded a more accurate fit for the seizure-free (SF,  $N = 11$ ) than the non-SF (NSF) group and, even though the difference between the groups was not significant, the goodness-of-fit distinguished NSF from SF patients with an area under the curve  $AUC = 84.1\%$ . We also explored the definition of a population model that combined data from different patients to fit the model parameters but was still individualized by considering the patient-specific MEG network. Even though the goodness-of-fit decreased compared to the individualized models, the difference between the SF and NSF groups held, and in fact became stronger and significant ( $p = 0.023$ ), and the group classification also improved slightly ( $AUC = 88.6\%$ ). Therefore, combining data from different patients may pave the way not only to generalize this framework to patients without SEEG recordings, but also to reduce the risk of over-fitting and improve the stability of the models. Finally, we considered the individualized models to derive alternative hypothesis of the seizure onset zones and to test the surgical strategy *in silico* for each patient. We found that RA regions were on average more likely to originate the seizures, but that alternative explanations were possible. Virtual resections of the RA when considering these alternative seeds significantly reduced seizure propagation, and to a greater extent for SF than NSF patients (although the difference was not significant). Overall, our findings indicate that spreading models based on the patient-specific MEG network can be used to predict surgical outcomes, with better fit results and greater reduction on seizure spreading linked to higher likelihood of seizure freedom after surgery.

## 1 Introduction

Epilepsy is a highly prevalent neurological disorder, affecting between 4 and 10 per 1000 people worldwide [1]. About 1 out of 3 people who suffer from epilepsy do not respond to medication, i.e. they present drug-resistant or refractory epilepsy [2]. In these cases, epilepsy surgery (ES), consisting of the removal or disconnection of the necessary brain regions to stop seizure propagation -/namely the *epileptogenic zone* [3]- is the treatment of choice. Several conditions

46 must be met for the surgery to proceed, including that a focal origin of the seizures can be found, and that the  
47 proposed surgery can be performed safely, i.e. without unwanted side-effects such as sensorimotor deficits, amnesia, or  
48 aphasia. Surgery outcomes vary greatly depending on epilepsy type, with seizure freedom attained for about 2/3s of the  
49 patients one year after surgery [4]. Although the majority of patients still experience a reduction in seizure frequency  
50 or intensity after surgery, even when surgery is not completely successful, side-effects and cognitive complaints are  
51 also common, and can be difficult to predict accurately on an individual basis [5].

52 In recent years, several efforts have been made to improve the outcome of epilepsy surgery. One important  
53 conceptual leap forward is the notion of *epileptogenic networks* [6], according to which even in case of focal epilepsy  
54 the *epileptogenic focus* should not be considered as solely responsible for seizure generation or propagation, but rather  
55 the existing brain network also plays a role in promoting (or inhibiting) the ictal state [7–9]. Within this perspective  
56 it has been found that several properties of the brain networks of epilepsy patients deviate from those of healthy  
57 controls [10–14]. In particular, abnormalities are often found relating to the *brain network hubs*, which often suffer  
58 from targeted damage in patients with neurological disorders (see Stam [8] for a review). In the case of epilepsy, hubs  
59 may facilitate the propagation of epileptiform activity throughout the brain [15, 16]. In fact, several studies have  
60 pointed out the existence of *pathological hubs*: abnormal, hyperconnected regions in the vicinity of the epileptic focus,  
61 which mediate seizure propagation [15, 17–19].

62 Within the network perspective, the effect of surgery is no longer straightforward to predict: local changes in a  
63 network may have widespread effects, or be compensated by the remaining network [20, 21]. Moreover, the specific  
64 effect of a surgery will depend on the individual network configuration [22], making it fundamental to consider patient-  
65 specific connectivity in order to tailor the surgery specifically to each patient. Network-based studies have found  
66 group-level differences between seizure-free and non-seizure free patients [19, 21, 23], for instance Nissen et al. [18]  
67 found that the removal of a pathological hub, or a region highly connected to it, was strongly associated with seizure  
68 freedom.

69 A data-driven manner to address this problem is via *computational models of epilepsy surgery*, which simulate *in*  
70 *silico* different resection strategies to help predict their impact before hand, with the goal of improving the planning  
71 of resective epilepsy surgery [24–33]. In order to tailor the resection strategy for each patient, and thus increase  
72 the chances of seizure freedom, the models are fitted to patient-specific data such as the underlying brain network  
73 connectivity (derived via different imaging techniques), stereo-typical patterns of seizure propagation and clinical  
74 biomarkers of the suspected location of the epileptogenic focus. Once the models have been defined, they can be used  
75 to predict the outcome of surgery [30, 31], or to propose alternative resection strategies, for instance in the case of a  
76 previous bad outcome or inoperable regions [31], or with a smaller impact than the actual surgery [25, 33–35].

77 The computational models of epilepsy surgery rely on the definition of a dynamical model of seizure generation  
78 and propagation. However, the specific mechanisms underlying seizure dynamics are not well known, and likely not  
79 unique: epilepsy is a heterogeneous disorder, and at least 6 different stereotypical patterns of seizure dynamics have  
80 been distinguished [24, 36, 37]. Thus, assumptions must be made in the modeling of seizure dynamics, and different  
81 levels of description, at different scales, are possible [38]. Realistic models make use of highly detailed non-linear  
82 dynamics [39], such as population-rate models [40] or neural-mass models, combined with one or several slow variables  
83 to account for the transition from normal to ictal activity [26, 30]. Within this perspective, several studies have tried  
84 to model seizure dynamics and predict the outcome of epilepsy surgery, with remarkable success at a group level:  
85 Sinha et al. [31], using a dynamical model based on EEG connectivity to identify epileptogenic regions, found that the  
86 overlap between these regions and the RA predicted surgery outcome with 81.3% accuracy. Proix et al. [37] found that  
87 their seizure model, the *epileptor model* [41], defined over MRI networks, could distinguish between good (Engel class  
88 I) and bad (Engel class III) outcomes. Further studies within this modelling framework also found a better match  
89 between the hypothesized EZ and propagation zone (i.e. the first regions to which ictal activity propagates to) for  
90 SF than NSF patients [42, 43]. On a virtual resection study, Sip et al. [44] found that the effect of the resection in  
91 the model correlated with surgical outcome, so that patients with Engel score I and II presented a significantly larger  
92 effect of virtual resections in the model. Finally, Goodfellow et al. [28] also found significant differences in the model  
93 prediction for Engel Class I and class IV patients, using an electrocorticogram (ECoG) modelling framework.

94 Detailed models of ictal activity, however, come at a high cost: several parameters need to be adjusted beforehand,  
95 with unavoidable arbitrary choices. This complicates the setting of the model parameters and either large quantities  
96 of data are needed, or several assumptions must be made. As a consequence there is a high risk of over-fitting, and  
97 generalizing the results to new data-sets becomes troublesome. In order to solve this problem, in-depth studies to  
98 characterize the dynamical properties of the models, and the interplay between network structure and emergent dy-  
99 namics, are needed [45–47], often in combination with elaborate modelling optimization frameworks, such as Bayesian  
100 inference [43, 44, 48, 49] or deep learning [50]. Another possibility to circumvent these issues is by considering simpler,  
101 abstract models that focus only on the behavior of interest: the propagation of ictal activity throughout the brain [33,  
102 34], accounted for by the slow permittivity variable of the epileptor and similar highly dimensional models Sip et al.  
103 [44]. Conceptually, this process is equivalent to other spreading processes on networks, a problem that has been well-  
104 characterized by means of *epidemic spreading models* [51]. Epidemic spreading models simulate the propagation of an  
105 agent from some given location on a network to other connected areas, a basic phenomenon appearing in a multitude  
106 of systems. In the case of brain dynamics, such models have been used to study the spreading of pathological proteins

107 on brain networks [52, 53], or the relation between brain structure and function [54]. Due to their ubiquity and  
108 relative mathematical simplicity, epidemic spreading models are supported by a wealth of mathematical background  
109 characterizing the emergent dynamics in relation to different properties of the underlying network. This information  
110 can later be useful for clinical applications, e.g. general rules for spreading phenomena on complex networks that can  
111 be applied to understand seizure propagation.

112 In previous studies we considered epidemic spreading models as the basis for seizure propagation over the brain,  
113 without trying to mimic the complicated biophysical mechanisms involved in the process [33, 34]. Within this frame-  
114 work, we found that epidemic spreading models fitted with patient-specific data could reproduce the stereotypical  
115 patterns of seizure propagation on patient-specific brain networks, individually for each patient. Moreover, by taking  
116 into account this patient-specific connectivity, alternative or smaller resections could be found with the model, which  
117 we hypothesized could lead to fewer side effects with the same outcome, in terms of seizure reduction [33, 34].

118 Here we consider an epidemic spreading model to generate individualized seizure propagation models that are  
119 based on the patient-specific MEG connectivity and seizure propagation pathways as derived from invasive EEG  
120 recordings. This framework generalizes on previous studies by our group [33, 34] by including a recovery mechanism  
121 in the spreading model, allowing the return to the healthy (post-ictal) state, so that seizures may remain local (i.e. if  
122 the affected regions recover before spreading the ictal state to distant regions) or generalize. We considered a group  
123 of 15 epilepsy patients who underwent epilepsy surgery, and for whom the surgical outcome at least one year after  
124 surgery was known. We illustrate how the present model can be used to generate alternative hypotheses on the seizure  
125 onset zone and test different resection strategies, and we discuss the challenges associated to the model fitting, even  
126 in this simple scenario, and associated risks. We also present a population model that integrates spreading data from  
127 all patients but can still be individualized and applied to patients without SEEG recordings. We discuss how this  
128 approach can help reducing the over-fitting risk and noise effects, and how it may increase the generalizability and  
129 clinical application of epilepsy surgery models.

## 130 2 Results

131 The individualized seizure propagation models were based on an epidemic spreading model –the Susceptible - Infected  
132 - Recovered or SIR model– equipped with patient-specific data, as depicted in figure 1. A total of 15 patients (9  
133 females) were included in the study, 11 of whom were seizure free (SF) one year after surgery (Engel Class 1A, see  
134 table 2 for the patient details).

### 135 2.1 Seizure propagation as an epidemic spreading process

136 Seizure propagation was modelled using the SIR model such that the susceptible (S), infected (I) and recovered (R)  
137 states accounted respectively for the healthy (pre-ictal), ictal and healthy (post-ictal) states. The SIR model describes  
138 the spreading of an epidemic process on a network from a set of seed regions to the other nodes, and it has been  
139 applied in a multitude of scenarios involving spreading phenomena. The emerging behavior of the system under this  
140 dynamics is well-characterized in relation to the underlying network structure [51, 55]. In this scenario, the model  
141 does not try to mimic the detailed biophysical processes involved in seizure generation and propagation, instead it  
142 is used here as an abstraction that includes only the most relevant features of seizure propagation [33, 34, 44, 51].  
143 The model is characterized by two control parameters, the global spreading rate  $\beta$  characterizing the probability of  
144 spreading of the infected state, and the recovery rate  $\gamma$  characterizing the recovery probability of each infected node.

145 The model was simulated on top of the patient’s brain network reconstructed from resting-state MEG recordings  
146 using the Brainnetome Atlas (246 nodes). Each region of interest (ROI) was represented via a *node*  $i$  in the network,  
147 and each connection via a *link*  $(i, j)$ , with the weight  $w_{ij}$  of link  $(i, j)$  indicating the strength of the coupling between  
148 ROIs  $i$  and  $j$ . The weight distribution affected the spreading pattern as  $w_{ij}$  modulated locally the spreading rate: the  
149 probability that an infected node  $i$  infected a neighbour  $j$  was given by  $\beta w_{ij}$ . Thus, strongly connected neighbours  
150 were more likely to propagate the infected state. As coupling metric we considered the uncorrected AEC (Amplitude  
151 Envelope Correlation). AEC-MEG networks include both short- and long-range functional connections, combining in  
152 one network aspects of structural and functional connectivity [34]. The networks were thresholded (but not binarized),  
153 with the link density  $\kappa$  acting as the third control parameter of the model. An exemplary case of the final weight  
154 matrix is shown in figure 1.

### 155 2.2 Individualized seizure propagation models

156 The seizure propagation model was adapted individually for each patient by fitting the simulated propagation patterns  
157 to patient-specific seizure propagation data derived from SEEG recordings and by setting the seed of epidemic spreading  
158 as the resected area (RA) (see 5.5.2 for more details). Two seizure propagation patterns were constructed, the *SIR*  
159 and the *SEEG seizure patterns*, depicting respectively the activation order of the sampled ROIs in the SIR- and  
160 SEEG-derived seizures. An exemplary case is shown in figure 1). The total correlation between the two patterns,  $C$ ,

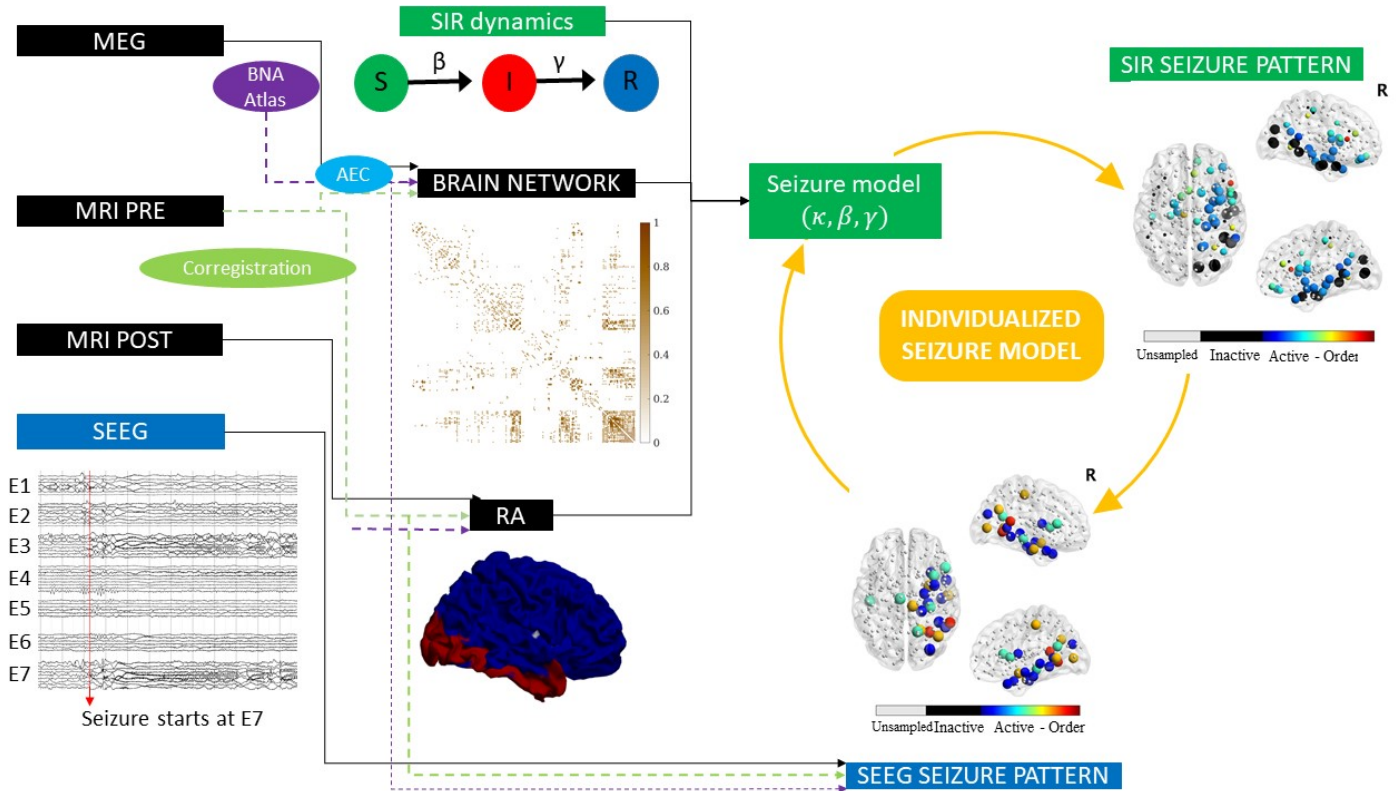

Figure 1: Sketch of the methodology followed in this study. The SIR model was used to simulate seizure propagation. As the backbone for the model dynamics, we used the patient-specific AEC-MEG network, and the seed regions were initially defined as the resection area (RA), which was reconstructed from the pre- and post-surgery MRIs. By analyzing the seizures generated by the model, we derived the *SIR seizure pattern*, describing seizure propagation in the model. This was compared to the *SEEG seizure pattern* as derived from SEEG recordings of ictal activity. The spreading patterns describe the activation order the active (i.e. infected, in the ictal state) and sampled (by the SEEG electrodes) ROIs. Comparison between the model and the data (see figure 2) allowed us to fit the model parameters to the SEEG pattern and create an *individualized seizure propagation model* for each patient.

161 as defined by Eq. 2 in the Methods, and illustrated in figure 2 (for the same exemplary case as in figure 1), was used  
 162 as the *goodness of fit* of the model (see sec. 5.5.2).

163 Within this framework, we found the set of parameters  $(\kappa, \beta, \gamma)$  yielding the best model fit  $C$  for each patient  
 164 (see Methods for details and figure 3A for the fit results). On average, we obtained a model fit of  $C = 0.30$  (with  
 165 standard deviation  $\text{std}_C = 0.20$ ). The model provided a (not significantly) better fit for the SF ( $C_{SF} = 0.35$ ) than  
 166 NSF ( $C_{NSF} = 0.15$ ) patient groups ( $C_{SF} - C_{NSF} = 0.20$ ,  $t(13) = 1.79$ ,  $p = 0.097$ , unpaired t-test), as shown in figure  
 167 3B. A ROC classification analysis based on the goodness of fit returned a good classification result with an area under  
 168 the curve ( $AUC$ ) of  $AUC = 0.841$ . There were no significant differences in the fit parameters between the groups  
 169 (average  $\pm$  standard deviation:  $\kappa = 25 \pm 22$ ,  $\beta = 0.02 \pm 0.03$ ,  $\gamma = 0.03 \pm 0.04$ ).

## 170 2.3 Population model

171 The population model  $\bar{C}(\beta_{RS}, \gamma)$  was defined by measuring the average fit across patients, and by re-scaling the  
 172 spreading rate  $\beta_{RS}$  to combine in a single quantity the main parameters controlling the expected number of infected  
 173 nodes, i.e. the original spreading rate, the density of connections (as given by  $\kappa$ ) and the size of the seed. Details  
 174 of this procedure are given in the methods (section 5.5.3). The resulting fit diagram (figure 4A) resembles a familiar  
 175 phase transition diagram, with an interface of high goodness of fit (yellow regions) corresponding to a roughly constant  
 176 spreading-to-recovery ratio  $\beta_{RS}/\gamma = \text{const}$ . Most individual best fits (black markers) fell within this region, although  
 177 there was large variability among the individual results (in fact, we found low signal to noise ratios of aprox. 1/5 as  
 178 shown in the Supp. Information, Supp. Fig. S2).

179 Within this population model, the best fit was  $\bar{C} = 0.13 \pm 0.19$ , corresponding to  $\beta_{RS} = 0.01$ ,  $\gamma = 10^{-4}$  (highlighted  
 180 rectangle in figure 4). Remarkably, when considering the fit results for each patient at the optimal population

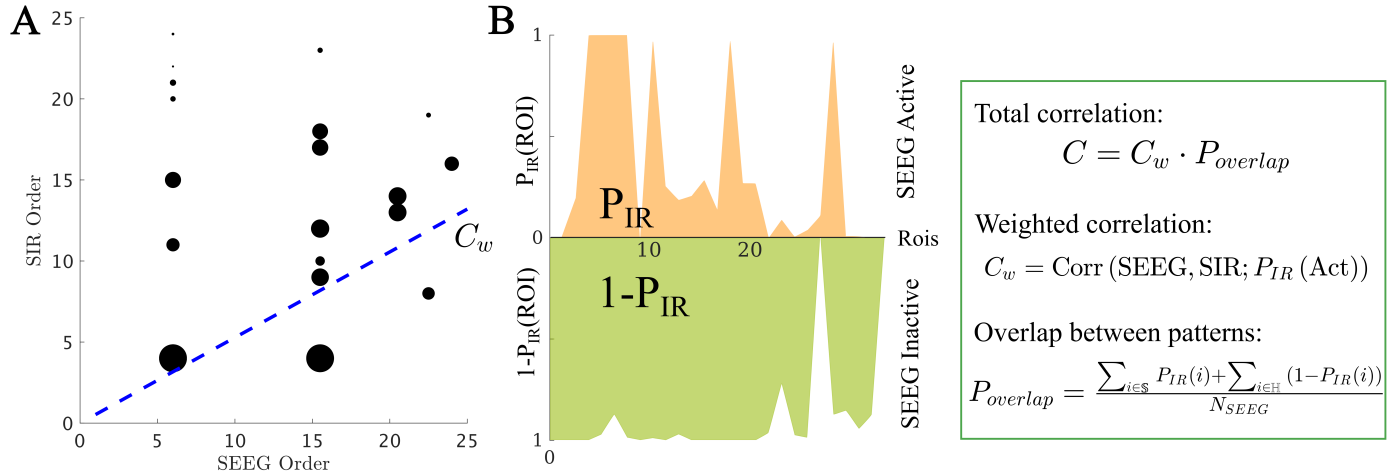

Figure 2: Total correlation  $C$  between the SIR and SEEG seizure patterns. First, the set of active (i.e. infected) ROIs in both patterns was identified, and the weighted correlation  $C_w$  between the activation orders was calculated (panel A, blue line). As correlation weights we used the probability that the ROI  $i$  was infected in the SIR pattern,  $P_{IR}(i)$ , depicted in the figure by the size of the black circles. Then, to control for the extension of the seizure in both patterns, we computed the weighted overlap between the active and inactive regions (panel B),  $P_{overlap}$ .  $P_{IR}(i)$  is the probability that the ROI  $i$  becomes infected during the spreading process. Conversely,  $1 - P_{IR}(i)$  is the probability that it does not become infected.  $\mathbb{S}$  and  $\mathbb{H}$  stand respectively for the sets of ROIs that are infected (i.e. in the seizure state) and not infected (i.e. in the healthy state) in the SEEG pattern. The total correlation was then defined as  $C = C_w P_{overlap}$ . For more details see section 5.5.2. The spreading patterns corresponding to this data are shown in figure 1 under “SIR Seizure Pattern” and “SEEG Seizure Pattern”, respectively.

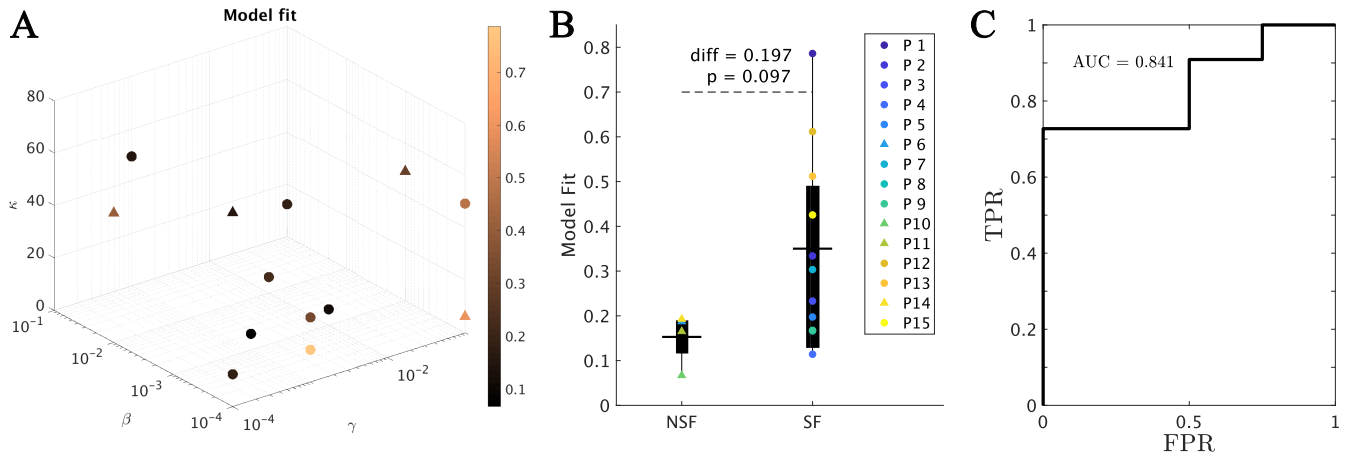

Figure 3: Model fitting results. **A** Best fit found for each patient. The model parameters  $(\kappa, \beta, \gamma)$  form the three axes and the color-code indicates the goodness of fit  $C$ . Note that some points overlap. **B** Group comparison of the goodness of fit, for the NSF and SF groups (unpaired t-test). Each color represents a different patient, as indicated by the legend. The solid lines on each box indicate the mean values. In panels A and B, SF (NSF) patients are indicated by circles (triangles). **C** ROC curve corresponding to the group classification according to the goodness of fit. A positive result was defined as a good outcome (SF). FPR indicates the false positive rate (NSF patients classified as SF), and TPR the true positive rate (SF patients classified as SF).

181 point, we found that the SF group ( $\bar{C}(SF) = 0.20 \pm 0.18$ ) presented a significantly better fit than the NSF group  
 182 ( $\bar{C}(NSF) = -0.07 \pm 0.16$ ,  $C_{SF} - C_{NSF} = 0.27$ ,  $t(13) = 2.59$ ,  $p = 0.02$ ), as shown in figure 4B. Moreover, the ROC  
 183 classification analysis in this case also provided a good classification (AUC = 0.886) between the SF and NSF groups  
 184 (see figure 4C).

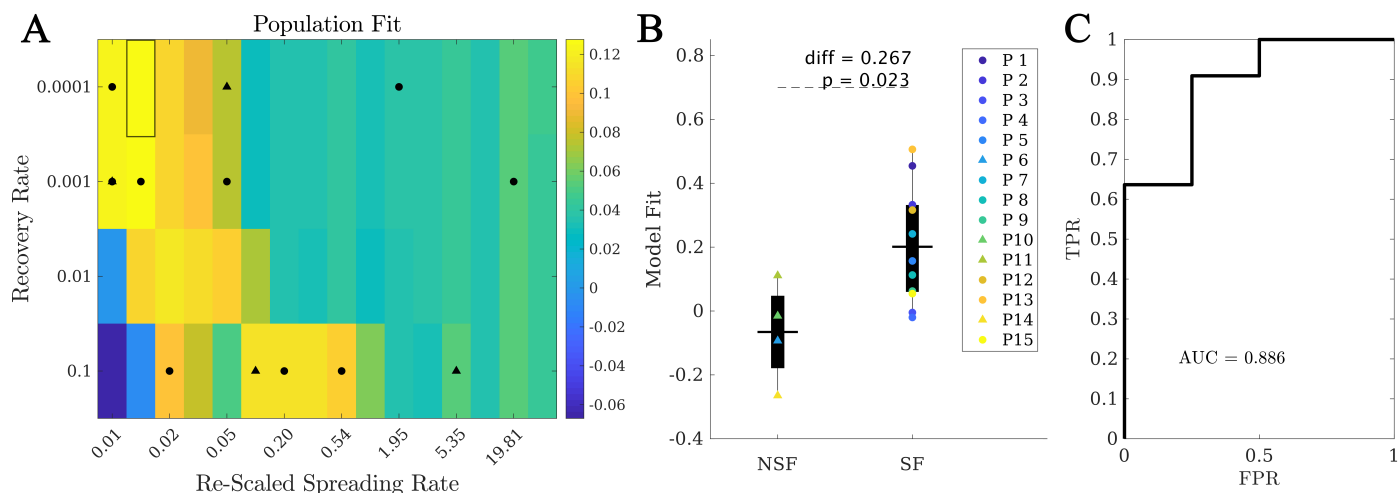

Figure 4: Population model. **A** Phase diagram showing the population fit  $\bar{C}(\beta_{RS}, \gamma)$ . Black markers indicate the location of the best individual fits in this diagram, with circles (triangles) corresponding to SF (NSF) patients. The highlighted rectangle indicates the best fit. **B** Comparison between the population fit for the SF and NSF groups. Solid lines indicate the mean values for each group. **C** ROC classification analysis between the SF and NSG groups, with an AUC = 0.886.

## 2.4 Alternative Seizure Onset Zones

Once the model was fitted to the patient-specific seizure propagation patterns, we estimated the likelihood of each individual ROI acting as the SOZ, as given by the total correlation metric,  $C_R$ , when ROI  $R$  was used as the single seed for the SIR dynamics. For this we considered the individualized spreading models (i.e. fitted individually for each patient) as they provided a better characterization of the individual SEEG spreading patterns. For all patients, single seeds could be found that provided a good approximation to the seizure propagation pathways, i.e. with high  $C_R$  values, as shown in figure 5 (left panels) for two exemplary cases. The *seed likelihood maps* depicted different degrees of localization and sparseness for different patients, as well as different degrees of overlap with the RA (also shown in figure 5 for comparison purposes, middle panels). From visual inspection, the RA tended to appear in regions with relatively high  $C_R$ , but did not include the maximum. In order to test whether RA ROIs tended to have higher  $C_R$  than non-RA ROIs, we compared the seed likelihood for the two ROI sets, for each patient, as shown in the right-side panels in figure 5. In these two exemplary cases, RA ROIs were significantly more likely to be the seed than non-RA ROIs. However, this was the case only for 7 out of 15 cases, of which 1 was NSF. For the remaining 8 cases, no significant difference between the groups was found (see Supp. Table S1).

At a group level, we found that RA ROIs were on average more likely to be the seed than non-RA ROIs, as shown in figure 6A ( $C_{RA} - C_{NRA} = 0.077$ ,  $p = 0.016$ ,  $t(14) = 2.74$ , paired t-test). However, the ROI with the maximum likelihood,  $C_{\text{best}}$ , did not belong to the RA for any case (see for instance the two exemplary cases shown in figure 5). Thus, the most likely single seeds were close to the RA, but did not belong to it. Despite the individual best seeds (*Best*) performing better than the RA, the difference was not significant. Moreover, both the *Best* and *RA* seeds performed better than the averaged individual RA ROIs,  $\langle RA \rangle$ , and than random seeds of the same size as the RA, *RND* (see Supp. Information for details of the comparisons).

No difference in the average seed-likelihood of the RA was found between the SF and NSF patients ( $C_{RA,SF} - C_{RA,NSF} = -0.006$ ,  $t(13) = -0.09$ ,  $p = 0.93$ , unpaired t-test), or in the maximum single seed-likelihood,  $C_{\text{max}}$  ( $C_{\text{best},SF} - C_{\text{best},NSF} = 0.08$ ,  $t(14) = 0.6$ ,  $p = 0.5$ ), as shown in figure 6C. Moreover, the difference between the SF and NSF groups also vanished when considering random seeds ( $C_{RND,SF} - C_{RND,NSF} = -0.02$ ,  $t(14) = -0.3$ ,  $p = 0.8$ , figure 6).

## 2.5 Virtual resection analysis

We performed a virtual resection analysis to simulate the effect of the surgery for each patient, considering optimal seeds of increasing sizes (derived with a recursive procedure) and virtual resections of the RA (see the Methods section for details). For each patient, there was a significant decrease in seizure propagation with the surgery for all considered seed sizes, as given by the normalized decrease in spreading  $\delta_{VR}$ . We found that, on average, the SF group presented larger  $\delta_{VR}$  (see figure 7A) for all considered sizes, but the difference was not significant in any case (see Supp. Fig. S2 for details of the comparisons). Finally, when considering the normalized decrease as a classification metric for SF versus NSF patients we found AUC values between 0.636 and 0.750 (average = 0.691), as shown in figure 7B.

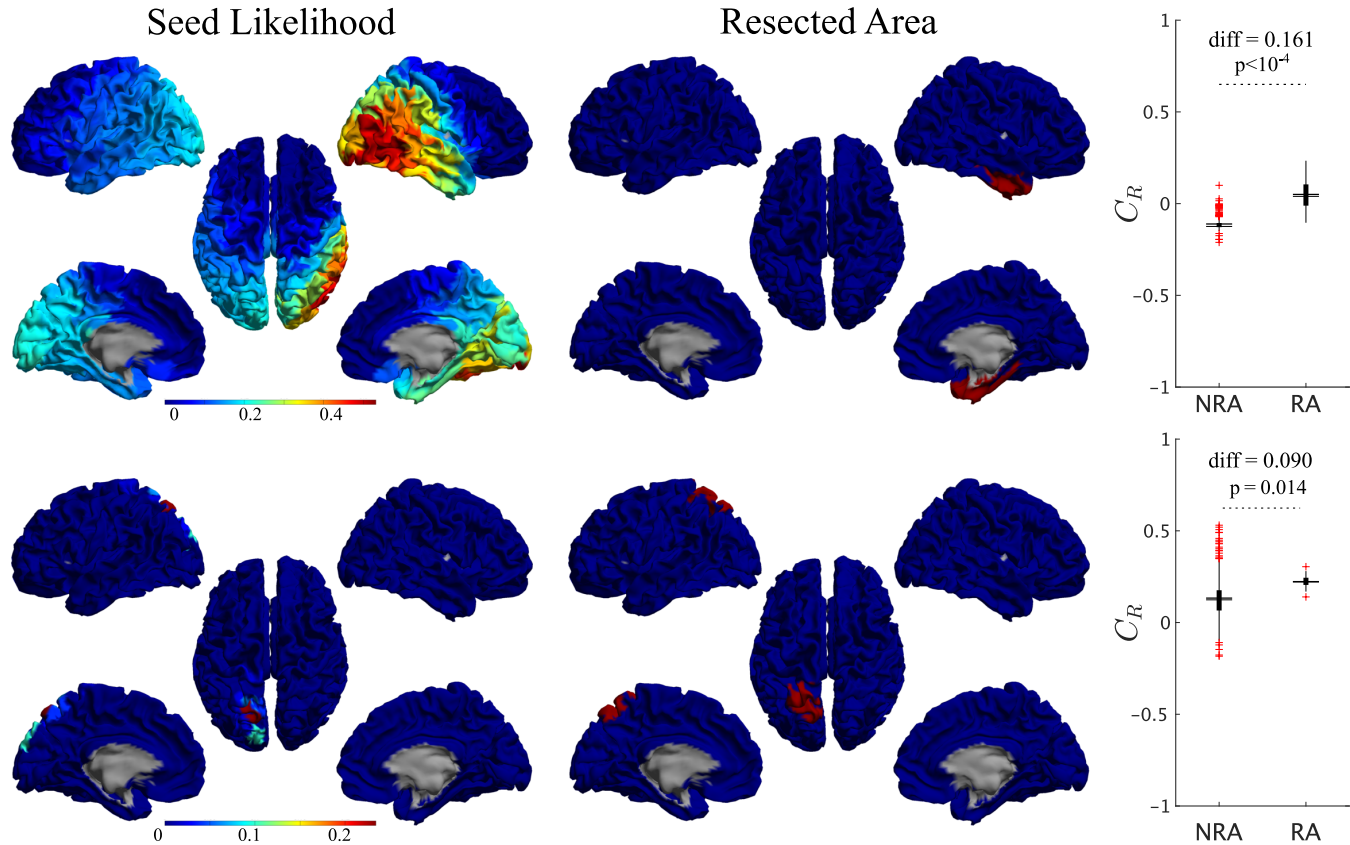

Figure 5: Seed-likelihood maps for two representative cases. Left panels show the seed-likelihood of each ROI,  $C_R$ , for two exemplary cases (cases 13 and 15, respectively from top to bottom), whereas the middle panels show the corresponding resected areas in red. The right panels indicate the comparison between RA and non-RA (NRA) ROIs, for these two cases (unpaired t-test). The solid lines stand for the mean values. Red pluses mark outliers (1.5 times over the interquartile range).

219 In order to understand what defines the effect of the resection, we computed the correlation between the normalized  
 220 decrease in logarithmic scale  $\log(\delta_{VR})$  and different dynamical and network properties (see table 1) that characterize  
 221 the network structure before and after the resection, as well as the effect of the resection. We found that the largest  
 222 amount of variance was explained by the size of the resection  $S_{RA}$ , with larger resections leading to a larger effect of  
 223 the VR, as one might expect. The centrality of the RA (given by the out-connectivity  $E_{RA}$  and betweenness centrality  
 224  $BC_{RA}$ ) also correlated significantly with the effect of the resection, although the effect was weaker. Remarkably, the  
 225 baseline centrality properties of the seed regions (i.e. size  $S_{seed}$ , out-connectivity  $E_{seed}$  and BC,  $BC_{seed}$ ) did not show  
 226 significant effects, but the properties of the seed *after* the resection did show a significant negative correlation with  
 227 the effect of the resection on spreading. The structural effect of the resection, given by the decrease in centrality of the  
 228 seed (both out-connectivity  $\Delta E_{seed}$  and BC  $\Delta BC_{seed}$ ) was significantly and positively correlated with the dynamical  
 229 effect. The model parameters also played a role in the effect of the virtual resections, with larger spreading-to-recovery  
 230 ratios associated with larger effects of the surgery.

231 The variables considered in the previous analysis are not independent: the different centrality metrics are re-  
 232 lated, and the properties of the RA also impact the structural effect of the resection, for instance. Therefore, to  
 233 identify the most relevant model properties determining the effect of the resection, we performed a step-wise linear  
 234 regression analysis. As dependent variable we considered the normalized effect of the resection, in logarithmic scale,  
 235  $\log(\delta_{IR}(i, seed_j))$ , for each patient  $i$  and seed  $j$ . The resulting (adjusted) model is shown in figure 8. We found that  
 236 only three variables survived: the size of the RA,  $S_{RA}$ , the BC of the seed in the resected network,  $BC_{seed,VR}$ , and the  
 237 decrease in BC of the seed due to the resection,  $\Delta BC_{seed}$ . The partial effect of all other variables was not significant  
 238 once these three metrics were included. The adjusted model achieved a goodness-of-fit  $r^2 = 0.468$ .

239 These analyses indicate that the effect of virtual resections in the model is predominantly characterized by the size  
 240 of the RA, as one might expect, but also by the centrality properties of the seed in relation to the RA. That is, both  
 241 the hub status of the seed *after* the resection, and the decrease in hub status due to the resection were important for

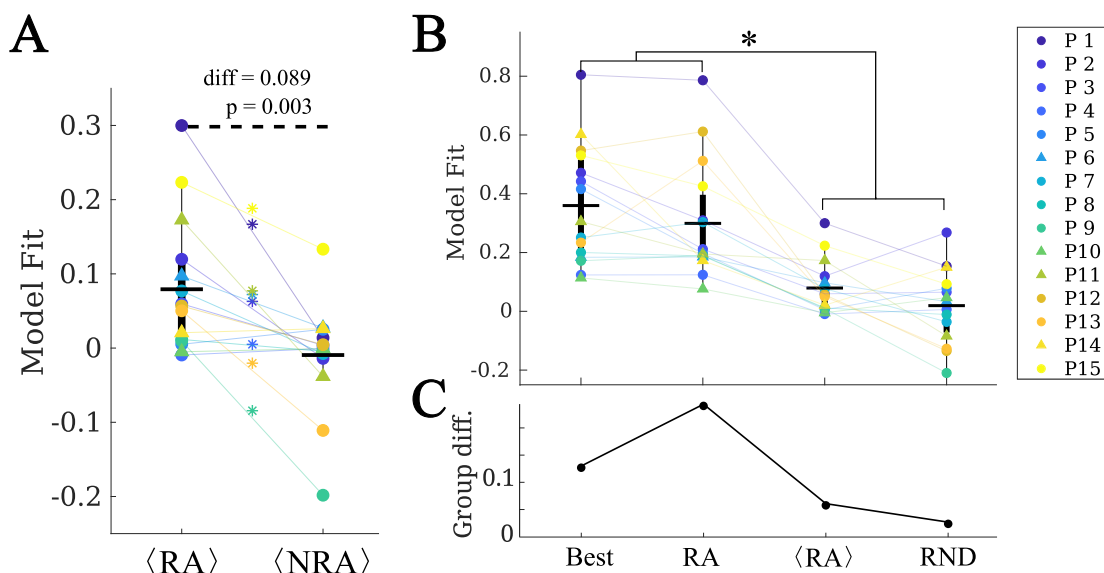

Figure 6: Analysis of alternative seeds. **A** RA regions had a significantly higher model fit (given by the total correlation when considering each ROI as the single epidemic seed,  $C_R$ ) than non-RA regions (NRA, paired t-test) on average. Stars indicate a significance difference at the patient-level. **B** Effect of the seed choice on the model fit. *Best* stands for the best single seed, *RA* for using the whole RA,  $\langle RA \rangle$  for the average of the RA ROIs single seed fits, and *RND* for random seeds of the same size as the RA. **C** Group difference (SF vs NSF) found for each of the seed fits. The two groups only differed significantly when using the RA as seed.

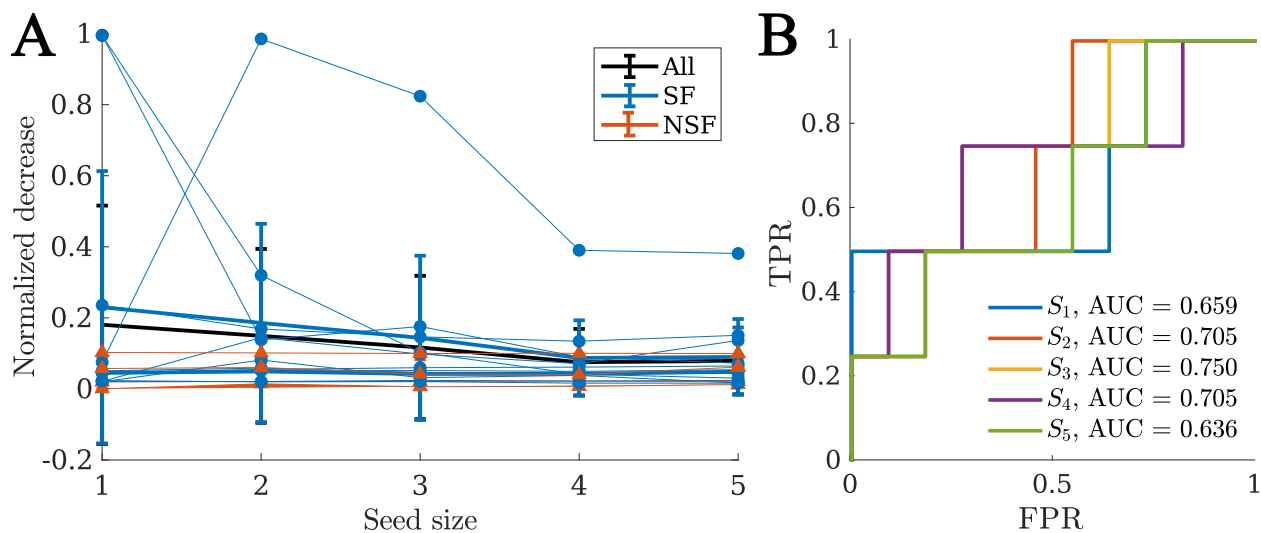

Figure 7: Virtual resection analysis. **A** Normalized decrease in spreading  $\delta_{VR}$  for seeds of increasing sizes. Each data point indicates an individual patient, blue circles stand for SF patients and red triangles for NSF patients. The thick lines indicate the average values for the whole group (black, "All"), the SF (blue) and NSF (red) groups. **B** ROC classification analysis for SF versus NSF outcome, for each considered seed size as indicated in the legend.

242 the decrease in spreading, but not the initial hub status *per se*.

### 243 3 Discussion

244 We have defined a computational framework to simulate seizure propagation and epilepsy surgery based on epidemic  
 245 spreading models that integrate patient-specific data. A model was built for each patient based on their individual  
 246 AEC-MEG brain network to combine structural and functional connectivity, and the propagation of ictal activity over



|            |                      | Effect | $r^2$ | $p$                                 |
|------------|----------------------|--------|-------|-------------------------------------|
| Model:     | $\beta\kappa/\gamma$ | +      | 0.09  | <b>0.01</b>                         |
| Baseline:  | $S_{RA}$             | +      | 0.33  | <b><math>8 \cdot 10^{-8}</math></b> |
|            | $S_{seed}$           | -      | 0.00  | 0.7                                 |
|            | $E_{RA}$             | +      | 0.11  | <b>0.004</b>                        |
|            | $E_{seed}$           | -      | 0.02  | 0.2                                 |
|            | $BC_{RA}$            | +      | 0.08  | <b>0.0</b>                          |
|            | $BC_{seed}$          | -      | 0.05  | 0.06                                |
| Resection: | $E_{seed}$           | -      | 0.10  | <b>0.006</b>                        |
|            | $\Delta E_{seed}$    | +      | 0.06  | <b>0.04</b>                         |
|            | $BC_{seed}$          | -      | 0.11  | <b>0.004</b>                        |
|            | $\Delta BC_{seed}$   | +      | 0.15  | <b><math>5 \cdot 10^{-4}</math></b> |

Table 1: Relation between the effect of VRs of the RA (as given by the normalized decrease in spreading after the resection) and the properties of the model, baseline and post-resection networks. As model parameter we consider the *spreading-to-recovery ratio*  $\beta\kappa/\gamma$ , which combines the three model parameters in one. The baseline state is characterized by the size  $S$ , the out-connectivity  $E$  and the betweenness centrality BC of the RA and the seed. The resected network (i.e. the network after the VR of the RA was performed) is characterized by the new out-connectivity  $E$  and BC of the seed, and by their respective decreases due to the virtual resection, i.e.  $\Delta E_{seed} = E_{seed}(\text{baseline}) - E_{seed}(\text{resection})$  and similarly  $\Delta BC_{seed} = BC_{seed}(\text{baseline}) - BC_{seed}(\text{resection})$ . Significant effects are indicated by bold font in the p-value.

247 the brain was modelled by means of a simple epidemic spreading model. The model was further individualized for  
 248 each patient by fitting the main parameters, namely the spreading and recovery rates, and the network density, to the  
 249 patient-specific seizure propagation pathways, as derived from SEEG data. We found that the model reproduced the  
 250 main aspects of seizure propagation for all patients, indicating that these simple spreading rules are enough to encode  
 251 the basic aspects of seizure propagation. Once fitted for each patient, the model can be used to generate alternative  
 252 hypotheses about the seizure onset zone, or to test the effect of resection strategies, as we have illustrated in this  
 253 study.

254 Epidemic spreading models capture the basic mechanisms of processes that propagate on networked systems,  
 255 and are supported by a well-grounded mathematical and computational framework [51, 56] that we can use to our  
 256 advantage in the context of epilepsy surgery. For example, the fundamental role of hubs on surgical outcomes is  
 257 expected from the perspective of epidemic spreading, as the epidemic threshold is known to vanish for networks with  
 258 a scale-free degree distribution (and therefore high-degree hubs) [51]. On the contrary, a strong community structure  
 259 can trap the epidemic in one of the communities, preventing large-scale spreading [57, 58], which relates to the clinical  
 260 observation that seizure propagation can often be restricted to one or a few brain lobes [1], as is the case in focal  
 261 epilepsy. The fact that epidemic spreading provides a good representation of seizure propagation suggests that other  
 262 network characteristics that are known to play an important role in epidemic spreading processes, such as temporal  
 263 changes in connectivity [59–62] due to mal-adaptive plasticity over long time scales (months to years) [63], degree  
 264 correlations [64] or dimensionality [56, 65, 66], may also affect seizure propagation.

265 In this study we decided to use MEG networks as the backbone of seizure propagation, in contrast with other  
 266 studies [30, 33, 37, 44] based on DTI (Diffusion Tensor Imaging) data. In a previous study we showed that the AEC  
 267 metric, whilst based on functional connectivity, retains information on the structural pathways [34] and can be used as  
 268 a cost-effective proxy for structural connectivity: DTI is not typically part of the standard pre-surgical evaluation of  
 269 the patients, has a much higher computational cost than AEC-MEG, and has low sensitivity to long range connections,  
 270 in particular inter-hemispheric ones [67].

### 271 3.1 Epidemic spreading predicts surgery outcome

272 One of the main goals of computational studies of epilepsy surgery is to predict surgery outcome and optimize surgical  
 273 planning. In our modeling framework, we found that the model, when considering the RA as the epidemic seed, yielded  
 274 a better fit (as given by the correlation between the modelled and recorded seizures) for SF than for NSF patients,  
 275 and the difference was significant when considering the population model. Moreover, considering the model fit as a  
 276 classification parameter led to a good differentiation between the SF and NSF groups, with an AUC of 0.841 for the  
 277 individual models and 0.886 for the population model, indicating that the goodness-of-fit could be used as a predictor  
 278 for surgical outcome. This result also suggests an explanation for the different surgical outcome for the SF and NSF  
 279 groups as, according to the model, the RA was a better approximation to the SOZ for SF patients, and consequently  
 280 its removal was more likely to lead to seizure freedom, as was indeed the case. Thus, if a better hypothesis on the SOZ  
 281 could be made for NSF patients using the computational model, then the resection strategy could also be improved,  
 282 potentially leading to a better outcome.

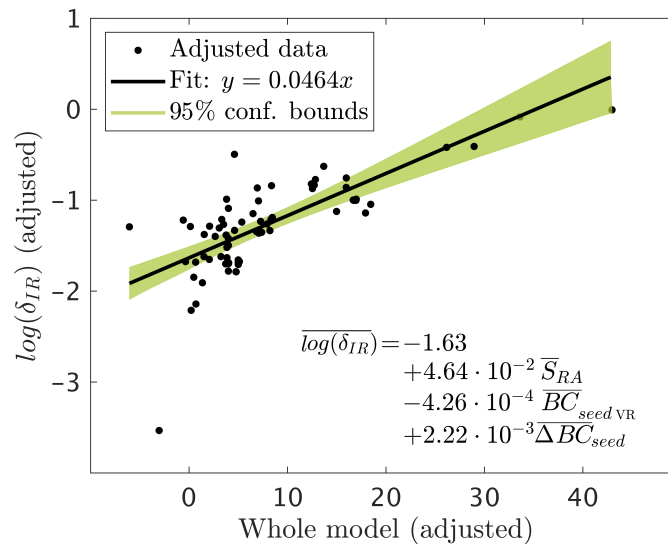

Figure 8: Added variable plot (partial regression leverage plot) of the linear regression model resulted from the step-wise regression analysis. Data-points indicate the adjusted response values against the adjusted predictor variable values, the solid line indicates the adjusted linear fit, and the shaded areas the 95% confidence intervals. The bars over the variable names indicate adjusted variables. The statistical details of the fit are: number of observations = 75, degrees of freedom  $df = 71$ , root Mean Squared Error  $rmse = 0.397$ ,  $r^2 = 0.489$ , Adjusted  $r^2 = 0.468$ , F-statistic vs. constant model = 22.7,  $p = 2.1 \cdot 10^{10}$ .

283 It is important to notice, however, that other interpretations are possible. The model fit results are dependent  
 284 on the SEEG sampling, which may have been inadequate for NSF patients, so that relevant aspects of the seizures  
 285 were missed [44]. In this case, the models would not be able to improve the hypothesis on the SOZ, although a poor  
 286 fitting result could still be used as an indication that more pre-surgical evaluations are needed, with e.g. alternative  
 287 spatial sampling. Finally, it is also possible that the worse fit of the model may have been caused by more prevalent  
 288 non-linear or multi-scale effects for NSF patients, that would make seizure dynamics deviate from a spreading process  
 289 [68]. In this case the mismatch would not indicate an error in the SEEG sampling or the surgery planning, but point  
 290 towards an intrinsic difference in seizure dynamics.

291 In order to shed light on this question, we made use of the seizure model to generate alternative hypotheses on the  
 292 SOZ by measuring for each individual ROI the likelihood of generating the observed seizures (Fig. 5). At a group level,  
 293 RA ROIs were significantly more likely to generate the observed seizures than non-RA ROIs, as expected. However,  
 294 for 8 out of 15 cases RA regions did not show higher seed-likelihood than non-RA regions, and the ROI with the  
 295 maximum seed-likelihood did not belong to the RA for any case. This suggests that the most likely seeds according to  
 296 the model were close to the RA, but did not belong to it. This result is in agreement with other modelling studies that  
 297 found modelled SOZ that did not completely overlap with the resected areas, even for SF patients [28, 31, 37], and is  
 298 likely associated with the incomplete sampling of the SEEG electrodes. We hypothesize that it may also be related  
 299 to the finding of pathological hubs whose disconnection from the SOZ can be enough to lead to seizure freedom, even  
 300 when the SOZ or the pathological hub remain unresected [18, 21, 25, 35].

301 Remarkably, we also found that the difference in goodness-of-fit between the SF and NSF groups disappeared when  
 302 considering the optimal single-seed fit. This suggests that one can find alternative hypotheses of the SOZ for NSF  
 303 patients that lead to a good model fit. Then, a resection targeting these regions might lead to a better outcome, in  
 304 agreement to our finding that the goodness-of-fit is a good predictor for surgical outcome. However, as this study  
 305 comprised only 4 NSF patients, more data would be needed to validate this finding.

306 Finally, we performed a virtual resection analysis to simulate the effect of the resective surgery *in silico* for each  
 307 patient [31, 33, 34]. We found that virtual resections of the RA led to a significant decrease in seizure propagation.  
 308 Here we considered the relative decrease in spreading and not seizure extinction to characterize the effect of a resection  
 309 in the model, as spreading in the model is never null (since the seed is always infected) and the considered VRs seldom  
 310 disconnected the seed completely. Therefore, the relative decrease is more informative than absolute post-surgery  
 311 spreading, as it reduces the influence of specific modelling choices. We found that the effect of the resection was  
 312 predominantly affected by i) the size of the resection, ii) the decrease of betweenness centrality of the seed as a  
 313 consequence of the resection; and iii) the betweenness centrality of the seed *after* the resection. Remarkably, the  
 314 centrality of the RA has been associated before with surgery outcomes, with the removal of network hubs being  
 315 associated with seizure freedom [18, 21, 33]. Here we have found that, more than the centrality of the removed

316 regions, it is the centrality of the SOZ in relation to the RA that will determine the effect of the resection. Given that  
317 the gold-standard for the actual SOZ in the clinical setting cannot be known, and this often needs to be approximated  
318 by the RA, a direct comparison with clinical results is difficult. Prospective studies that include alternative hypothesis  
319 for the SOZ, however, can be used to gain more insight in this regard. Finally, other model properties, such as the  
320 spreading-to-recovery ratio, also correlated significantly with the relative decrease in spreading, but the effect did not  
321 survive the step-wise linear regression analysis, and was mediated by the size of the resection and the centrality of the  
322 seed.

323 In our study, we found that the relative effect of VRs was larger for the SF +than for the NSF group, and we found  
324 AUC values between 0.63 and 0.75 when using the normalized decrease in spreading to classify the patients according  
325 to surgical outcome. This again indicates, in agreement with our results based on the goodness-of-fit, that the RA is  
326 a better approximation of the SOZ for SF patients, which is information that can be gained with the model prior to  
327 the surgery for a given resection strategy. However, the small sample size in this study limits the predictive power of  
328 the results, and the difference in effect between the SF and NSF was not significant. Overall, a larger patient group,  
329 including more than one SEEG seizure pattern per patient, would help to improve the predictive power of the model.

### 330 3.2 Modeling considerations and clinical application

331 Epilepsy surgery models need to be individualized for each patient if they are to be of clinical use, in order to take into  
332 account the patient-specific brain network and seizure dynamics. This presents a transversal problem in the modeling  
333 of epilepsy surgery, as individualizing the models requires extensive data, which is not always available. The existing  
334 data on seizure spreading is typically based on SEEG recordings which, whilst presenting high temporal and spatial  
335 resolution, are limited by sparse spatial sampling, which is known to impact the characterization of the seizures and  
336 outcome prediction [69], and can lead to bias in the results [46]. Here we have considered the role of the whole brain  
337 network in seizure spreading by using a whole brain atlas and MEG data, to reduce the bias due to sparse sampling,  
338 but even then only the regions sampled by the SEEG electrodes could be taken into account to fit the model.

339 In order to simplify the modelling framework, in this study we considered a simple spreading model as the basis  
340 for seizure propagation, but there were still specific limitations associated with the modeling scheme. In particular,  
341 the propagation of ictal activity captured by the SEEG electrodes is not a binary process, as it was assumed here. On  
342 the contrary, ictal activity presents in different qualitative and quantitative forms, and the reduction of the seizure  
343 propagation dynamics to a binary activation-inactivation sequence is an oversimplification. Moreover, in order to  
344 avoid introducing arbitrary time-scales in the model, the seizure patterns only considered the activation order of the  
345 ROIs, and not the activation times, which reduces the resolution of the pattern further (as it cannot distinguish fast  
346 from slow spreading).

347 Despite the low dimensionality of the model, there was still noise in the fitting method. This noise is intrinsic to  
348 the limited clinical data and fitting method, and it is not due to the stochastic nature of the SIR dynamics, which  
349 was already taken into consideration: the SIR dynamics were run  $10^4$  times per iteration, and 10 iterations were  
350 performed, and averaged, for each set of parameters. Moreover, the total correlation metric defined by Eq. 2 also  
351 takes into account the stochastic nature of the dynamics by weighting every node by its probability of activation in the  
352 model. The *parameter noise* can lead to a noisy parameter landscape, with several local maxima. As a consequence,  
353 there is the risk of over-fitting the individual models, and only limited information can be extracted from the fitting  
354 parameters (i.e. from the values of  $\kappa$ ,  $\beta$  and  $\gamma$  leading to the best individual fits).

355 In light of these considerations, it is even more important to refine and simplify the modelling frameworks so  
356 as to minimize over-fitting problems and improve the generalizability of the models. A deeper understanding of  
357 the biophysical mechanisms leading to seizure generation and propagation will help reducing the number of model  
358 parameters that need to be fitted numerically. For instance, considering spreading models, one could systematically  
359 –over a large enough patient cohort– study whether the spreading dynamics of epilepsy patients is poised in the  
360 supercritical regime and it moves to the sub-critical regime after the surgery. This general information could then be  
361 integrated into the model to simplify the fitting algorithm.

### 362 3.3 Population model

363 The population model was defined here as the model (as defined by the set of control parameters) leading to the best  
364 average fit over the patient group. Despite its name, this model is still individualized for each patient: it considers  
365 the patient-specific network (including the link weights that define the local spreading probabilities) and seed regions.  
366 As it is shown in figure 4, the resulting fit diagram displays the familiar behavior of a phase transition, with an  
367 intermediate region of high correlation (good population fit), separating regions of low correlation (poor population  
368 fit). Remarkably, most individual fit points were located in this intermediate region, with the exception of three  
369 patients who presented very “bulky” activation patterns (by visual inspection, not shown), i.e. in which several ROIs  
370 got infected simultaneously. More studies with improved data resolution and larger patients cohorts should be able  
371 to establish whether there are actual differences in the dynamical repertoire of these two types of patients.

372 The average model fit achieved by the population model at its optimal point was much smaller (about 1/3 on  
373 average) than those obtained with the individual models. However, the difference between the SF and NSF groups  
374 not only still held in this model, but it became stronger and significant ( $\bar{C}(SF) - \bar{C}(NSF) = 0.267$ ,  $p = 0.02$  and  
375  $AUC = 0.886$ ). This suggests that the loss of detail in the fitting does not affect the main aspects of seizure  
376 propagation, and signals towards the possible over-fitting of the individual models due to parameter noise. In this  
377 case, the population model, even though reducing the overall fit, provided a more reliable description of the system.

378 A reliable population model would drastically increase the clinical applicability of this framework, as its application  
379 would not rely on patient-specific SEEG data. SEEG studies are highly invasive, and are avoided in the pre-surgical  
380 evaluation whenever possible. Thus, a computational model that could provide relevant information on surgery  
381 outcome without the need to be fitted to patient-specific invasive data would provide a valuable tool. Information from  
382 other imaging modalities could potentially also be included, such as ictal EEG recordings of epileptiform abnormalities  
383 found in MEG or MRI lesions. This information could be incorporated into the model for example as factors that  
384 affect the seed-likelihood of the involved ROIs.

### 385 3.4 Limitations

386 As we have discussed above, modeling of seizures presents inherent limitations associated with the choices of the  
387 dynamical model and fitting procedures [46, 48]. In our case, this translated into difficulties defining alternative  
388 seeds and characterizing virtual resections. Identifying seed regions dramatically increases the dimensionality of the  
389 fitting problem, even when considering linear approximations as we have done here. Estimating seed-probability maps  
390 for seeds of increasing sizes becomes a combinatorial problem that soon loses tractability. The use of optimization  
391 algorithms (such as simulated annealing, genetic algorithms or deep learning, for instance [33, 34]) would reduce  
392 the computational burden but still be affected by an exponentially larger number of local maxima as the seed size  
393 increases, due to the parameter noise. In our analysis we have opted for a linearization approach, characterizing the  
394 effect of single seeds and following a recursive method to derive seeds of increasing sizes. Deriving more detailed seeds  
395 would require larger amounts data, for instance by considering several seizures per patient.

396 The use of SEEG data to fit the model poses another limitation for its clinical use, given that SEEG recordings  
397 are highly invasive and not always part of the presurgical evaluation. A reliable population model (that can be  
398 individualized for each patient by considering their individual brain connectivity) would allow us to also use the model  
399 for patients without SEEG recordings, as we have discussed above. Moreover, as we have shown in this study, such a  
400 model can also help reducing parameter noise, leading to more robust results than the individual models.

401 Another main limitation of the study is the small size of the patient group, which complicates the validation of  
402 the results. For instance, the VR analysis points towards a larger decrease in seizure propagation after the virtual  
403 resections for the SF group, but the difference is not significant. A larger cohort would allow us to improve the  
404 classification analysis to clarify this finding. Moreover, increasing the patient group size would also improve the  
405 formulation of the population model.

406 Modeling of virtual resections suffers from some inherent limitations we well. First of all, virtual resections are  
407 typically modelled by removing or disconnecting nodes or links from the network [1, 30, 70]. However, this does not  
408 account for the generalized effect that a local resection can have on the network [71] nor does it consider plasticity  
409 mechanisms [8, 61, 72–74] which are known to occur following brain lesions and resections [75, 76]. An even more  
410 fundamental limitation is the difficulty of the validation of the results, as different resection strategies cannot be tested  
411 clinically. Validation must always be done indirectly, by comparing the model predictions (regarding for instance the  
412 location of the SOZ or surgery outcome) with the clinical results [28, 29, 31, 33, 34]. In this work, we have made use  
413 of multi-modal patient-specific data to optimise and validate the model and, as final validation mechanism, we have  
414 considered surgery outcome. This can only be the first step, however, as the ultimate goal is to use the computational  
415 models to aid epilepsy surgery planning. Prospective or pseudo-prospective studies in which the models are used  
416 before or without knowledge of the surgery to predict outcome at an individual level (i.e. not only at a group level)  
417 will be necessary in the future to test the applicability of the model on a clinical setting.

## 418 4 Conclusion and outlook

419 Epidemic spreading models fitted with patient-specific data reproduce the individual seizure propagation patterns.  
420 This simple framework is sufficient to encode the fundamental aspects of seizure propagation on brain networks. Our  
421 results highlight that such individualized computational models may aid epilepsy surgery planning by identifying  
422 alternative seed regions and/or resection strategies, with the ultimate goal of improving surgery outcome rates.

| Case       | Sex      | Resected Area                                          | $S$       | Engel Score | #E        | #ECP       | $N_{SR}$  |
|------------|----------|--------------------------------------------------------|-----------|-------------|-----------|------------|-----------|
| P1         | F        | R Frontal                                              | 4         | 1A          | 13        | 128        | 47        |
| P2         | F        | R Temporal, Occipital                                  | 13        | 1A          | 14        | 142        | 50        |
| P3         | F        | L Temporal, Occipital                                  | 5         | 1A          | 15        | 144        | 53        |
| P4         | M        | R Temporal                                             | 13        | 1A          | 13        | 126        | 49        |
| P5         | F        | R Temporal                                             | 10        | 1A          | 11        | 109        | 42        |
| <b>P6</b>  | <b>F</b> | <b>R Lat. Temporal</b>                                 | <b>5</b>  | <b>2A</b>   | <b>9</b>  | <b>99</b>  | <b>40</b> |
| P7         | F        | L Temporal                                             | 5         | 1A          | 11        | 110        | 44        |
| P8         | F        | L Parietal                                             | 4         | 1A          | 10        | 104        | 37        |
| P9         | M        | R Post. Lat. Temporal,<br>Post. Insula, Post. Parietal | 3         | 1A          | 12        | 102        | 38        |
| <b>P10</b> | <b>F</b> | <b>R Temporal</b>                                      | <b>13</b> | <b>2D</b>   | <b>11</b> | <b>114</b> | <b>45</b> |
| <b>P11</b> | <b>F</b> | <b>L Frontal</b>                                       | <b>4</b>  | <b>2C</b>   | <b>13</b> | <b>117</b> | <b>47</b> |
| P12        | M        | L Frontal                                              | 6         | 1A          | 12        | 124        | 40        |
| P13        | M        | L Temporal                                             | 5         | 1A          | 12        | 106        | 30        |
| <b>P14</b> | <b>F</b> | <b>L Temporal</b>                                      | <b>6</b>  | <b>3A</b>   | <b>15</b> | <b>194</b> | <b>60</b> |
| P15        | M        | R Temporal                                             | 12        | 1A          | 10        | 107        | 32        |

Table 2: Patient data. Ep. = Epilepsy,  $y$  = years,  $S$  = number of resected ROIs, #E = number of intracranial electrodes, #ECP = total number of electrode contact points,  $N_{SR}$  = number of BNA ROIs sampled by the SEEG electrodes. F = female, M = male, R = right, L = left.

## 5 Methods

### 5.1 Patient group

We retrospectively analyzed 15 patients (9 females) with refractory epilepsy. All patients had undergone resective surgery for epilepsy at the Amsterdam University Medical Center, location VUmc, between 2016 and 2019. All patients had received a magnetoencephalography (MEG) recording, had undergone an SEEG (stereo-electroencephalography) study, including post-implantation CT-scans, and underwent pre- and post-surgical magnetic resonance imaging (MRI). All patients gave written informed consent and the study was performed in accordance with the Declaration of Helsinki and approved by the VUmc Medical Ethics Committee.

The patient group was heterogeneous with temporal and extratemporal resection locations and different etiology (see Table 2 for details). Surgical outcome was classified according to the Engel classification at least one year after the operation [77]. Patients with Engel class 1A were labelled as seizure free (SF), and patients with any other class were labelled as non seizure free (NSF). 4 patients were deemed NSF.

### 5.2 Individualized Brain Networks

The individualized computer model was based on the brain network of each patient, which was reconstructed in the Brainnetome Atlas (BNA) from MEG scans, as follows:

- **Pre-operative MRI scans** were used for co-registration with the MEG data. MRI T1 scans were acquired on a 3T whole-body MR scanner (Discovery MR750, GE Healthcare, Milwaukee, Wisconsin, USA) using an eight-channel phased-array head coil. Anatomical 3D T1-weighted images were obtained with a fast spoiled gradient-recalled echo sequence. During reconstruction, images were interpolated to 1 mm isotropic resolution.
- **MEG recordings** were obtained during routine clinical practice using a whole-head MEG system (Elekta Neuromag Oy, Helsinki, Finland) with 306 channels consisting on 102 magnetometers and 204 gradiometers. The patients were in supine position inside a magnetically shielded room (Vacuumshmelze GmbH, Hanau, Germany). Typically, three eyes-closed resting-state recordings of 10 to 15 minutes each were acquired and used in the presurgical evaluation for the identification and localization of interictal epileptiform activity. The first of these recordings of sufficient quality was used here to generate the brain network. The data were sampled at 1250 Hz, and filtered with an anti-aliasing filter at 410 Hz and a high-pass filter of 0.1 Hz. The head's position relative to the MEG sensors was determined using the signals from 4 or 5 head-localization coils that were recorded continuously. The positions of the head-localization coils and the outline of the scalp (roughly 500 points) were measured with a 3D digitizer (Fastrak, Polhemus, Colchester, VT, USA).
- **MEG pre-processing.** The temporal extension of Signal Space Separation (tSSS) [78, 79] was used to remove artifacts using Maxfilter software (Elekta Neuromag, Oy; version 2.1). For a detailed description and parameter settings see Hillebrand et al. [80]. The MEG data were filtered in the broadband (0.5 – 48.0 Hz).

- 455 • **MEG & MRI co-registration.** The points on the scalp surface were used for co-registration of the MEG  
456 scans with the anatomical MRI of the patient through surface-matching software. A single sphere was fitted to  
457 the outline of the scalp and used as a volume conductor model for the beamforming approach.
- 458 • **Source reconstruction: beamforming.** Neuronal activity was reconstructed using an atlas-based beamform-  
459 ing approach, modified from Hillebrand et al. [81], to reconstruct the time-series of neuronal activation of the ROI  
460 centroids [82]. We considered the 246 ROIs of the BNA atlas [83], whose centroids were inversely transformed  
461 to the co-registered MRI of the patient. Then, a scalar beamformer (Elekta Neuromag Oy; beamformer; version  
462 2.2.10) was applied to reconstruct each centroid’s time-series, as detailed elsewhere [82].
- 463 • **Processing.** The time-series of each centroid were visually inspected for epileptiform activity and artifacts. On  
464 average,  $58 \pm 11$  interictal and artefact-free epochs of 16384 samples were selected for each patient. The epochs  
465 were further analyzed in Brainwave (version 0.9.151.5 [84]) and were down-sampled to 312 Hz, and filtered in  
466 the broadband (0.5 - 48 Hz).
- 467 • **Functional networks** were generated considering each brain region as a node. The elements  $w_{ij}$  of the con-  
468 nectivity matrix, indicating the strength of the connection between ROIs  $i$  and  $j$ , were estimated by the AEC  
469 (Amplitude Envelop Correlation) [85–88]. The uncorrected AEC (i.e. without correcting for volume conduc-  
470 tion) connectivity metric was selected as it maintains information on the structural connectivity pattern, whilst  
471 including information on long-range functional connections. AEC values were re-scaled between 0 (perfect  
472 anti-correlation) and 1 (perfect correlation), with 0.5 indicating no coupling [89]. Functional networks were  
473 thresholded at different levels  $\theta$  indicating the percentage of remaining links in the network, and the resulting  
474 average connectivity  $\kappa$  of the network, indicating the average number of links that each node had, was deter-  
475 mined. Notice that the networks were thresholded but not binarized, so that  $w_{ij}$  takes values between 0 and 1.  
476 An exemplary adjacency matrix is shown in figure 1 under “Brain Network”.

### 477 5.3 Resection Area

478 The resection area (RA) was determined for each patient from the three-month post-operative MRI. This was co-  
479 registered to the pre-operative MRI (used for the MEG co-registration) using FSL FLIRT (version 4.1.6) 12 parameter  
480 affine transformation. The resection area was then visually identified and assigned to the corresponding BNA ROIs,  
481 namely those for which the centroid had been removed during surgery. An exemplary RA is shown in figure 1 under  
482 “RA”.

### 483 5.4 Individualized Propagation Pattern

484 All patients underwent stereo-electroencephalography (SEEG) electrode implantation. The number and location of the  
485 intracerebral electrodes (Ad-Tech, Medical Instrument Corporation, USA, 10-15 contacts, 1.12 mm electrode diameter,  
486 5 mm intercontact spacing; and DIXIE, 10-19 contacts, 0.8 mm electrode diameter, 2 mm contact length, 1.5 insulator  
487 length, 16 – 80.5 insulator spacer length) were planned individually for each patient by the clinical team, based on the  
488 location of the hypothesized SOZ and seizure propagation pattern. The number of electrodes per patient (see table  
489 2 for details) varied between 9 and 15 (average =  $12.1 \pm 1.8$ ) and the total number of contacts between 194 and 99  
490 (average =  $121 \pm 24$ ).

491 The locations of the SEEG contact points (CPs) were obtained for each patient from the post-implantation CT  
492 scan (containing the SEEG electrodes) that was co-registered to the preoperative MRI scan using FSL FLIRT (version  
493 4.1.6) 12 parameter affine transformation. Each electrode CP was assigned the location of the nearest ROI centroid.  
494 Because BNA ROIs are in general larger than the separation between contact points, different CPs can have the same  
495 ROI assigned.

496 The activation time of each sampled ROI was determined according to the SEEG recording as follows. First, the  
497 onset time of ictal activity was identified for each SEEG channel by a clinician expert. Then, the CPs were grouped  
498 into activation steps and a seizure pattern was built from one typical seizure for each patient. This activation pattern  
499 was then translated into the BNA space, so that the each sampled ROI  $i$  was assigned an activation step. This  
500 constituted the *SEEG seizure pattern*.

### 501 5.5 Seizure Propagation Model

#### 502 5.5.1 SIR Dynamics

503 Seizure propagation was modelled using the Susceptible-Infected-Recovered (SIR) model [51]. Simulation of the  
504 epidemic spreading process on the network took place as follows. Initially, all nodes were set in the susceptible state  
505  $S$ , except for a set of *seed* nodes in the infected state  $I$ . At each subsequent step, each infected node could propagate  
506 the infection to any of its neighbours with probability  $\beta w_{ij}$ , where  $\beta$  characterizes the global spreading rate and  $w_{ij}$   
507 the link weight as defined above. Each infected node had a probability  $\gamma$  of recovering to the  $R$  state. Depending on

the network structure, the epidemics can show different spatio-temporal spreading profiles described by the probability  $p_i(t)$  that each ROI  $i$  becomes infected at step  $t$ .

SIR dynamics was simulated in custom-made Matlab algorithms using Monte-Carlo methods, with  $N_R = 10^4$  iterations of the algorithm for each configuration to assure convergence.

### 5.5.2 Individualized Propagation Model

The seizure propagation model was fitted for each patient by comparing the spatio-temporal propagation pattern in the model to the patient’s clinical seizure pattern (constructed as described above), when the RA was used as the seed for epidemic spreading. The mean activation time for each ROI was calculated as  $t_i = \sum_{t=0}^T p_i(t)$ , where  $T$  is the maximum integration time.  $t_i$  described the activation sequence of the ROIs during a modelled seizure. By sorting the ROIs according to their mean activation time, we defined the SIR spreading pattern, which indicated the activation order of the involved ROIs. Given that not all BNA ROIs were sampled by the SEEG electrodes,  $t_i$  was sub-sampled to the sampled ROIs. This constituted the *SIR seizure pattern*, as shown in figure 1 (under “SIR Seizure Pattern”), which could be compared with the SEEG seizure pattern.

The *goodness of fit* of the model was estimated by taking into account two factors, as illustrated in 2. The first one is the correlation between activation orders of ROIs that became infected both in the SEEG and SIR patterns (see 2A). In order to take into account the noisy nature of the SIR dynamics, such that not the same ROIs get infected in each realization, we considered the weighted Pearson’s correlation coefficient,  $C_w$ . As correlation weights we used the fraction of realizations that each ROI  $i$  got infected during a modelled seizure,  $P_{IR}(i)$ . Thus, ROIs that were consistently involved in the spreading weighted more in the correlation than ROIs that were only rarely involved.

The second factor  $P_{\text{overlap}}$  (see 2B) computed the overlap between active and inactive ROIs in the two patterns, to also take into account the actual extension of the seizures, i.e.

$$P_{\text{overlap}} = N_{\text{SEEG}}^{-1} \left[ \sum_{i \in \mathbb{S}} P_{IR}(i) + \sum_{i \in \mathbb{H}} (1 - P_{IR}(i)) \right] = P_{\text{act}} + P_{\text{inact}}, \quad (1)$$

where  $N_{\text{SEEG}}$  is the number of ROIs sampled by the SEEG electrodes (on average =  $43.6 \pm 7.9$ ), and  $\mathbb{S}$  and  $\mathbb{H}$  are respectively the sets of active (in the seizure state) and inactive (in the healthy state) ROIs in the SEEG pattern. Thus, the *total correlation* between the two patterns was defined as

$$C = C_w \cdot P_{\text{overlap}}, \quad (2)$$

This metric equals 1 in case of exactly equal activation patterns, 0 in the case of null-overlap or correlation, and  $-1$  in the case of complete anti-correlation of activation times (but equal seizure areas). We note however that  $C$  decays from 1 faster than a simple correlation metric when there are discrepancies between the patterns, since it takes into consideration not only the activation times, but also the activation areas.

In order to fit the model to the SEEG data, the RA was set as the seed of the epidemics, and the model parameters  $(\kappa, \beta, \gamma)$  were fitted to the data by maximizing  $C$ , independently for each patient. In order to do so, the SIR dynamics was simulated for a range of values of the free parameters  $(\beta, \gamma \in \{10^{-4}, 10^{-3}, 10^{-2}, 10^{-1}\}, \kappa/N = \{0.025, 0.05, 0.10, 0.20, 0.30\})$ , leading to the 3-dimensional fit-map  $C(\kappa, \beta, \gamma)$ . Two exemplary fit-maps are shown in Supp. Fig. 1. In order to minimize noise effects and be able to estimate the error in the measure,  $C$  values were averaged over 10 iterations of the model (each comprising  $10^4$  repetitions for the SIR dynamics), and the error in the measure was defined as the standard deviation across these 10 iterations.

### 5.5.3 Population model

We defined the population model as the model that provided the best fit overall, by averaging the fit results of all patients. Given that spreading in the model is strongly influenced by the connectivity of the seed, we defined a re-scaled spreading rate,  $\beta_{RS} = \beta E(\text{seed})$ , where  $E(\text{seed}) = \sum_{i \in \text{seed}} \sum_{j \in \text{nseed}} w_{ij}$  is the total link weight from the seed to the rest of the network, and  $\text{nseed}$  is the set of nodes that do not belong to the seed. For a given  $\beta$ ,  $E(\text{seed})$  characterizes the expected number of infected regions in the first steps of the seizure spreading. Thus,  $\beta_{RS}$  characterizes the actual spreading probability of the seizure in the model, combining in a single parameter  $\kappa$  and  $\beta$ , and also taking into account the different seed sizes. Therefore, in order to build the population model, we expressed the individual fit results in terms of  $C(\beta_{RS}, \gamma)$ , and averaged the individual fit maps to obtain the population fit  $\bar{C}(\beta_{RS}, \gamma)$ .

### 5.5.4 Alternative seed regions

Alternative seed regions were found in the model by considering each ROI  $R$  as the single seed of epidemic spreading, once the model was fitted to the patient-specific seizure propagation patterns. Then, the seed-likelihood of the ROI was defined as the total correlation between the SEEG and SIR patterns,  $C_R$ . Only ROIs leading to spreading were included in the analyses. From this analysis we estimated the best fit given by a single ROI, referred to as “Best” and the average value of the fit given by the RA regions, when considered individually as seeds, referred to as  $\langle RA \rangle$ .

558 Finally, for comparison purposes we also estimated the average model fit given by random seeds ( $N = 20$ ) of the same  
559 size of the RA, referred to as *RND*.

## 560 5.6 Simulation of Resections

561 We conducted virtual resections (VRs) of the ROIs that were part of the RA to simulate the effect of the surgery in the  
562 model. In order to do this, the nodes belonging to the RA were disconnected from the network by setting to 0 all their  
563 connections. The effect of each resection was characterized by the normalized decrease in spreading in the resected  
564 network (VR) with respect to the original (or baseline, BS) spreading:  $\delta_{VR} = (IR_{BS} - IR_{VR})/IR_{BS}$ , where  $IR$  is the  
565 fraction of nodes that became infected at any point during the modelled seizure, that is,  $IR = I(t \rightarrow \infty) + R(t \rightarrow \infty)$ .

566 The model parameters were chosen as the optimal fitting parameters for each patient, whereas the seed regions  
567 were defined following a recursive optimization method. Starting from the best single seed, all possible combinations  
568 of this node with the remaining 245 nodes were tested as spreading seeds, and the one leading to the best model  
569 fit (i.e. maximum total correlation) was chosen. This process was subsequently iterated until seeds of size 5 were  
570 obtained. To account for the large differences in seed sizes and connectivity, we re-scaled the spreading rate by the  
571 fraction between the out-connectivity (number of links to the rest of the network) of the RA and the considered seed.

572 To understand what network and model characteristics relate to the effect of the resection on spreading we estimated  
573 the Pearson correlation coefficient between the normalized decrease in spreading due to the resection,  $\delta_{VR}$ , and different  
574 network and model metrics. In particular, as model metric we considered the spreading-to-recovery ratio,  $\beta\kappa/\gamma$ , which  
575 takes into account that spreading is enhanced by  $\beta$  and  $\kappa$  and slowed by  $\gamma$ . As network metrics we considered the  
576 size  $S$  (number of nodes), out-connectivity  $E$  (number of links to the rest of the network) and average betweenness  
577 centrality  $BC$  of the RA and the seed. For the seed we considered three scenarios: the baseline level (BS, prior to the  
578 resection), the post-resection level (VR) and the decrease due to the resection,  $\Delta$ .

579 In order to identify the most relevant model variables to predict the effect of a virtual resection in the model, we  
580 performed a step-wise linear regression model analysis. We used the *Statistical and Machine Learning Toolbox* with  
581 standard settings (*stepwiselm* function with default settings). Only linear effects, and no interaction effects, were  
582 allowed in the linear model. As dependent variable we considered the normalized effect of the resection in logarithmic  
583 scale,  $\log(\delta_{IR})$ . As independent variables we considered the same network and model metrics as in the pairwise  
584 correlation analyses.

## 585 5.7 Statistics

586 The weighted correlation coefficient was used to determine the correlation between the SEEG and SIR seizure prop-  
587 agation patterns. For comparisons between resected and non-resected areas, and between different seed definitions,  
588 we used paired Student's t-tests, whereas for comparisons between SF and NSF patients, we used unpaired Student's  
589 t-tests. Significance thresholds for statistical comparisons were set at  $p < 0.05$ .

590 We performed a receiver-operating characteristic (ROC) curve analysis to study the patient classification based on  
591 the goodness of fit of the models and the normalized effect of virtual resections. A positive result was defined as good  
592 (SF) outcome.

593 In order to account for the noise in the SIR model, the dynamics were run  $10^4$  to attain each SIR seizure pattern,  
594 and this was repeated 10 times to obtain averaged values. The errors were defined as the standard deviation between  
595 the 10 realizations of the model. The same procedure was used in the virtual resection analysis.

## 596 5.8 Data availability

597 The data used for this manuscript are not publicly available because the patients did not consent for the sharing of  
598 their clinically obtained data. Requests to access to the data-sets should be directed to the corresponding author. All  
599 user-developed codes are publicly available in GitHub.

## 600 6 Acknowledgements

601 Ana P. Millán and Ida A. Nissen were supported by ZonMw and the Dutch Epilepsy Foundation, project number  
602 95105006. The funding sources had no role in study design, data collection and analysis, interpretation of results,  
603 decision to publish, or preparation of the manuscript.

## 604 7 Competing Interests

605 The authors declare that they have no competing interests.



## 8 Author Contributions

A.P.M., E.C.W.S., C.J.S., I.A.N, A.H. conceptualized the study, E.C.W.S., C.J.S., I.A.N, S.I., J.C.B., P.V.M., A.H. participated in the funding acquisition, A.P.M, E.C.W.S., C.J.S, A.H. devised the Methodology, A.P.M. performed the formal analysis, A.P.M, I.A.N, A.H. devised the software and visualization E.C.W.S., C.J.S., P.V.M., A.H. participated in the supervision, E.C.W.S., S.I., J.C.B. provided resources, A.P.M. wrote the original draft and all authors participated in writing, review and editing.

## References

- [1] P. N. Banerjee, D. Filippi, and W. A. Hauser. “The descriptive epidemiology of epilepsy—a review”. *Epilepsy Research* 85.1 (2009), pp. 31–45.
- [2] P. Kwan et al. “Definition of drug resistant epilepsy: consensus proposal by the ad hoc Task Force of the ILAE Commission on Therapeutic Strategies”. *Epilepsia* 51.6 (2010), pp. 1069–1077.
- [3] H. O. Lüders et al. “The epileptogenic zone: general principles”. *Epileptic Disorders* 8.2 (2006), pp. 1–9.
- [4] D. J. Englot et al. “Epileptogenic zone localization using magnetoencephalography predicts seizure freedom in epilepsy surgery”. *Epilepsia* 56.6 (2015), pp. 949–958.
- [5] B. C. Jobst and G. D. Cascino. “Resective epilepsy surgery for drug-resistant focal epilepsy: a review”. *Jama* 313.3 (2015), pp. 285–293.
- [6] F. Bartolomei et al. “Defining epileptogenic networks: contribution of SEEG and signal analysis”. *Epilepsia* 58.7 (2017), pp. 1131–1147.
- [7] M. A. Kramer and S. S. Cash. “Epilepsy as a disorder of cortical network organization”. *The Neuroscientist* 18.4 (2012), pp. 360–372.
- [8] C. J. Stam. “Modern network science of neurological disorders”. *Nature Reviews Neuroscience* 15.10 (2014), pp. 683–695.
- [9] E. H. Smith and C. A. Schevon. “Toward a mechanistic understanding of epileptic networks”. *Current neurology and neuroscience reports* 16.11 (2016), p. 97.
- [10] L. Douw et al. “Epilepsy is related to theta band brain connectivity and network topology in brain tumor patients”. *BMC Neuroscience* 11.1 (2010), p. 103.
- [11] M. Centeno and D. W. Carmichael. “Network connectivity in epilepsy: resting state fMRI and EEG–fMRI contributions”. *Frontiers in Neurology* 5 (2014), p. 93.
- [12] N. Sinha et al. “Structural brain network abnormalities and the probability of seizure recurrence after epilepsy surgery”. *Neurology* 96.5 (2021), e758–e771.
- [13] N. Sinha et al. “Focal to bilateral tonic–clonic seizures are associated with widespread network abnormality in temporal lobe epilepsy”. *Epilepsia* 62.3 (2021), pp. 729–741.
- [14] P. Besson et al. “Anatomic consistencies across epilepsies: a stereotactic-EEG informed high-resolution structural connectivity study”. *Brain* 140.10 (2017), pp. 2639–2652.
- [15] S.-H. Jin, W. Jeong, and C. K. Chung. “Mesial temporal lobe epilepsy with hippocampal sclerosis is a network disorder with altered cortical hubs”. *Epilepsia* 56.5 (2015), pp. 772–779.
- [16] S. Ramaraju et al. “Removal of interictal MEG-derived network hubs is associated with postoperative seizure freedom”. *Frontiers in neurology* 11 (2020), p. 563847.
- [17] W. Liao et al. “Altered functional connectivity and small-world in mesial temporal lobe epilepsy”. *PLoS ONE* 5.1 (2010), e8525.
- [18] I. A. Nissen et al. “Identifying the epileptogenic zone in interictal resting-state MEG source-space networks”. *Epilepsia* 58.1 (2017), pp. 137–148.
- [19] N. M. da Silva et al. “Network reorganisation following anterior temporal lobe resection and relation with post-surgery seizure relapse: a longitudinal study”. *NeuroImage: Clinical* 27 (2020), p. 102320.
- [20] J. Hebbink et al. “Phenomenological network models: Lessons for epilepsy surgery”. *Epilepsia* 58.10 (2017), e147–e151.

- 652 [21] I. A. Nissen et al. “Localization of the epileptogenic zone using interictal MEG and machine learning  
653 in a large cohort of drug-resistant epilepsy patients”. *Frontiers in Neurology* 9 (2018), p. 647.
- 654 [22] M. Gerster et al. “Patient-specific network connectivity combined with a next generation neural mass  
655 model to test clinical hypothesis of seizure propagation”. *Frontiers in Systems Neuroscience* (2021),  
656 p. 79.
- 657 [23] P. N. Taylor et al. “The impact of epilepsy surgery on the structural connectome and its relation to  
658 outcome”. *NeuroImage: Clinical* 18 (2018), pp. 202–214.
- 659 [24] P. N. Taylor, M. Kaiser, and J. Dauwels. “Structural connectivity based whole brain modelling in  
660 epilepsy”. *Journal of Neuroscience Methods* 236 (2014), pp. 51–57.
- 661 [25] S. Olmi et al. “Controlling seizure propagation in large-scale brain networks”. *PLoS Computational  
662 Biology* 15.2 (2019), e1006805.
- 663 [26] T. Proix et al. “Permittivity coupling across brain regions determines seizure recruitment in partial  
664 epilepsy”. *Journal of Neuroscience* 34.45 (2014), pp. 15009–15021.
- 665 [27] F. Hutchings et al. “Predicting surgery targets in temporal lobe epilepsy through structural connectome  
666 based simulations”. *PLoS Computational Biology* 11.12 (2015), e1004642.
- 667 [28] M. Goodfellow et al. “Estimation of brain network ictogenicity predicts outcome from epilepsy surgery”.  
668 *Scientific Reports* 6.1 (2016), p. 29215.
- 669 [29] M. A. Lopes et al. “An optimal strategy for epilepsy surgery: Disruption of the rich-club?” *PLoS  
670 Computational Biology* 13.8 (2017), e1005637.
- 671 [30] V. K. Jirsa et al. “The virtual epileptic patient: individualized whole-brain models of epilepsy spread”.  
672 *Neuroimage* 145 (2017), pp. 377–388.
- 673 [31] N. Sinha et al. “Predicting neurosurgical outcomes in focal epilepsy patients using computational mod-  
674 elling”. *Brain* 140.2 (2017), pp. 319–332.
- 675 [32] P. Laiou et al. “Quantification and selection of ictogenic zones in epilepsy surgery”. *Frontiers in Neu-  
676 rology* 10 (2019), p. 1045.
- 677 [33] I. A. Nissen et al. “Optimization of epilepsy surgery through virtual resections on individual structural  
678 brain networks”. *Scientific reports* 11.1 (2021), pp. 1–18.
- 679 [34] A. P. Millán et al. “Epidemic models characterize seizure propagation and the effects of epilepsy surgery  
680 in individualized brain networks based on MEG and invasive EEG recordings”. *Scientific reports* 12.1  
681 (2022), pp. 1–20.
- 682 [35] S. An et al. “Optimization of surgical intervention outside the epileptogenic zone in the Virtual Epileptic  
683 Patient (VEP)”. *PLoS Computational Biology* 15.6 (2019), e1007051.
- 684 [36] Y. Wang et al. “Mechanisms underlying different onset patterns of focal seizures”. *PLoS Computational  
685 Biology* 13.5 (2017).
- 686 [37] T. Proix et al. “Individual brain structure and modelling predict seizure propagation”. *Brain* 140.3  
687 (2017), pp. 641–654.
- 688 [38] D. Depannemaecker et al. “Modeling seizures: From single neurons to networks”. *Seizure* 90 (2021),  
689 pp. 4–8.
- 690 [39] L. Junges et al. “The role that choice of model plays in predictions for epilepsy surgery”. *Scientific  
691 Reports* 9.1 (2019), pp. 1–12.
- 692 [40] J.-y. Liou et al. “A model for focal seizure onset, propagation, evolution, and progression”. *Elife* 9  
693 (2020).
- 694 [41] V. K. Jirsa et al. “On the nature of seizure dynamics”. *Brain* 137.8 (2014), pp. 2210–2230.
- 695 [42] J. Makhlova et al. “Virtual Epileptic Patient brain modeling: relationships with seizure onset and  
696 surgical outcome”. *Epilepsia* (2022).
- 697 [43] A. N. Vattikonda et al. “Identifying spatio-temporal seizure propagation patterns in epilepsy using  
698 Bayesian inference”. *Communications biology* 4.1 (2021), pp. 1–13.
- 699 [44] V. Sip et al. “Data-driven method to infer the seizure propagation patterns in an epileptic brain from  
700 intracranial electroencephalography”. *PLoS Computational Biology* 17.2 (2021), e1008689.

- 701 [45] J. Courtiol et al. “Dynamical Mechanisms of Interictal Resting-State Functional Connectivity in Epilepsy”.  
702 *Journal of Neuroscience* 40.29 (2020), pp. 5572–5588.
- 703 [46] V. Sip et al. “Computational modeling of seizure spread on a cortical surface”. *Journal of computational*  
704 *neuroscience* 50.1 (2022), pp. 17–31.
- 705 [47] K. El Houssaini, C. Bernard, and V. K. Jirsa. “The epileptor model: a systematic mathematical analysis  
706 linked to the dynamics of seizures, refractory status epilepticus, and depolarization block”. *Eneuro* 7.2  
707 (2020).
- 708 [48] M. Hashemi et al. “The Bayesian Virtual Epileptic Patient: A probabilistic framework designed to  
709 infer the spatial map of epileptogenicity in a personalized large-scale brain model of epilepsy spread”.  
710 *NeuroImage* (2020), p. 116839.
- 711 [49] M. Hashemi et al. “On the influence of prior information evaluated by fully Bayesian criteria in a  
712 personalized whole-brain model of epilepsy spread”. *PLoS computational biology* 17.7 (2021), e1009129.
- 713 [50] M. Hashemi et al. “Simulation-Based Inference for Whole-Brain Network Modeling of Epilepsy using  
714 Deep Neural Density Estimators”. *medRxiv* (2022).
- 715 [51] R. Pastor-Satorras et al. “Epidemic processes in complex networks”. *Reviews of Modern Physics* 87.3  
716 (2015), pp. 925–979.
- 717 [52] L. R. Peraza et al. “Structural connectivity centrality changes mark the path toward Alzheimer’s dis-  
718 ease”. *Alzheimer’s & Dementia: Diagnosis, Assessment & Disease Monitoring* 11 (2019), pp. 98–107.
- 719 [53] D. N. Schoonhoven et al. “Tau protein spreads through functionally connected neurons in Alzheimer’s  
720 disease”. *In Preparation* (2022).
- 721 [54] C. J. Stam et al. “The relation between structural and functional connectivity patterns in complex brain  
722 networks”. *International Journal of Psychophysiology. Research on Brain Oscillations and Connectivity*  
723 *in A New Take-Off State* 103 (2016), pp. 149–160.
- 724 [55] A. Barrat, M. Barthelemy, and A. Vespignani. *Dynamical processes on complex networks*. Cambridge  
725 University Press, 2008.
- 726 [56] P. Moretti and M. A. Munoz. “Griffiths phases and the stretching of criticality in brain networks”.  
727 *Nature communications* 4.1 (2013), pp. 1–10.
- 728 [57] U. T. Srinivasan et al. “Response of complex food webs to realistic extinction sequences”. *Ecology* 88.3  
729 (2007), pp. 671–682.
- 730 [58] J. P. Gleeson. “Cascades on correlated and modular random networks”. *Physical Review E* 77.4 (2008),  
731 p. 046117.
- 732 [59] N. Masuda and P. Holme. “Predicting and controlling infectious disease epidemics using temporal  
733 networks”. *F1000prime reports* 5 (2013).
- 734 [60] O. E. Williams et al. “The shape of memory in temporal networks”. *Nature communications* 13.1 (2022),  
735 pp. 1–8.
- 736 [61] A. P. Millán et al. “Concurrence of form and function in developing networks and its role in synaptic  
737 pruning”. *Nature Communications* 9.1 (2018), pp. 1–10.
- 738 [62] A. P. Millán, J. J. Torres, and J. Marro. “How memory conforms to brain development”. *Frontiers in*  
739 *Computational Neuroscience* 13 (2019), p. 22.
- 740 [63] C. De Luca and M. Papa. “Looking inside the matrix: perineuronal nets in plasticity, maladaptive  
741 plasticity and neurological disorders”. *Neurochemical Research* 41.7 (2016), pp. 1507–1515.
- 742 [64] P. Van Mieghem et al. “Influence of assortativity and degree-preserving rewiring on the spectra of  
743 networks”. *The European Physical Journal B* 76.4 (2010), pp. 643–652.
- 744 [65] A. P. Millán, J. J. Torres, and G. Bianconi. “Complex network geometry and frustrated synchroniza-  
745 tion”. *Scientific reports* 8.1 (2018), pp. 1–10.
- 746 [66] A. P. Millán et al. “Complex networks with tuneable spectral dimension as a universality playground”.  
747 *Physical Review Research* 3.2 (2021), p. 023015.
- 748 [67] H. Chen et al. “Optimization of large-scale mouse brain connectome via joint evaluation of DTI and  
749 neuron tracing data”. *Neuroimage* 115 (2015), pp. 202–213.

- 750 [68] S. H. Strogatz. *Nonlinear dynamics and chaos: with applications to physics, biology, chemistry, and*  
751 *engineering*. CRC press, 2018.
- 752 [69] Y. Wang et al. “Interictal intracranial electroencephalography for predicting surgical success: The im-  
753 portance of space and time”. *Epilepsia* 61.7 (2020), pp. 1417–1426.
- 754 [70] L. G. Kini et al. “Virtual resection predicts surgical outcome for drug-resistant epilepsy”. *Brain* 142.12  
755 (2019), pp. 3892–3905.
- 756 [71] M. Demuru et al. “Validation of virtual resection on intraoperative interictal data acquired during  
757 epilepsy surgery”. *Journal of Neural Engineering* 17.6 (2020), p. 066002.
- 758 [72] A. Holtmaat and K. Svoboda. “Experience-dependent structural synaptic plasticity in the mammalian  
759 brain”. *Nature Reviews Neuroscience* 10.9 (2009), pp. 647–658.
- 760 [73] A. P. Millán et al. “Growth strategy determines the memory and structural properties of brain net-  
761 works”. *Neural Networks* 142 (2021), pp. 44–56.
- 762 [74] C. J. Stam et al. “Emergence of modular structure in a large-scale brain network with interactions  
763 between dynamics and connectivity”. *Frontiers in Computational Neuroscience* 4 (2010), p. 133.
- 764 [75] M. K. Sidhu et al. “Memory network plasticity after temporal lobe resection: a longitudinal functional  
765 imaging study”. *Brain* 139.2 (2016), pp. 415–430.
- 766 [76] Y. Tao and B. Rapp. “Investigating the network consequences of focal brain lesions through comparisons  
767 of real and simulated lesions”. *Scientific Reports* 11.1 (2021), pp. 1–17.
- 768 [77] J. Engel Jr. “Outcome with respect to epileptic seizures.” *Surgical treatment of the epilepsies* (1993),  
769 pp. 609–621.
- 770 [78] S. Taulu and J. Simola. “Spatiotemporal signal space separation method for rejecting nearby interference  
771 in MEG measurements”. *Physics in Medicine & Biology* 51.7 (2006), p. 1759.
- 772 [79] S. Taulu and R. Hari. “Removal of magnetoencephalographic artifacts with temporal signal-space sepa-  
773 ration: demonstration with single-trial auditory-evoked responses”. *Human Brain Mapping* 30.5 (2009),  
774 pp. 1524–1534.
- 775 [80] A. Hillebrand et al. “Feasibility of clinical magnetoencephalography (MEG) functional mapping in the  
776 presence of dental artefacts”. *Clinical Neurophysiology* 124.1 (2013), pp. 107–113.
- 777 [81] A. Hillebrand et al. “Frequency-dependent functional connectivity within resting-state networks: an  
778 atlas-based MEG beamformer solution”. *Neuroimage* 59.4 (2012), pp. 3909–3921.
- 779 [82] A. Hillebrand et al. “Direction of information flow in large-scale resting-state networks is frequency-  
780 dependent”. *Proceedings of the National Academy of Sciences* 113.14 (2016), pp. 3867–3872.
- 781 [83] L. Fan et al. “The human brainnetome atlas: a new brain atlas based on connectional architecture”.  
782 *Cerebral Cortex* 26.8 (2016), pp. 3508–3526.
- 783 [84] *Brainwave*. <https://home.kpn.nl/stam7883/brainwave.html>.
- 784 [85] A. Bruns et al. “Amplitude envelope correlation detects coupling among incoherent brain signals”.  
785 *Neuroreport* 11.7 (2000), pp. 1509–1514.
- 786 [86] M. J. Brookes et al. “Measuring functional connectivity using MEG: methodology and comparison with  
787 fcMRI”. *Neuroimage* 56.3 (2011), pp. 1082–1104.
- 788 [87] J. F. Hipp et al. “Large-scale cortical correlation structure of spontaneous oscillatory activity”. *Nature*  
789 *Neuroscience* 15.6 (2012), pp. 884–890.
- 790 [88] G. L. Colclough et al. “How reliable are MEG resting-state connectivity metrics?” *Neuroimage* 138  
791 (2016), pp. 284–293.
- 792 [89] C. T. Briels et al. “In pursuit of a sensitive EEG functional connectivity outcome measure for clinical  
793 trials in Alzheimer’s disease”. *Clinical Neurophysiology* 131.1 (2020), pp. 88–95.
